# Supplementary material for: Cross-Cultural Differences in the Generation of Novel Ideas in Middle Childhood
Source: Front Psychol. 2020 Aug 13;11:1829. doi: 10.3389/fpsyg.2020.01829 (PMC7438980; doi:10.3389/fpsyg.2020.01829)
Supplement: Supplementary file 1 [file Data_Sheet_1.xlsx]

## Sheet: Tabelle1
culture	mean_obj	mean_pat	mean_obj_unique	mean_obj_unique	mean_convt	mean_manip	mean_innov	mean_play	mean_pplay	mean_fanta
1	10.4	6.2	3	3.2	1	0	0.78	8.02	0.61	0
1	8.2	1.8	0.8	0.4	1.37	0.83	0.32	5.27	0.41	0
1	2.2	5.2	0.4	1.8	1.36	0	0.37	0.48	0	0
1	10.2	5	1.4	1.4	2.41	1.75	0.89	4.52	0.63	0
1	14	8.4	4.8	3.8	1.61	0.47	3.29	5.17	2.84	0.62
1	17.2	7.8	2.2	3.4	2.7	5.09	1.7	7.12	0.6	0
1	23.6	13	7	6.2	3.41	8.56	4.81	5.89	0.7	0.22
1	18	14	4.4	7	2.73	4.01	2.51	5.74	3.01	0
1	8.4	3.6	1.8	1.2	2.39	0.48	1.81	3.04	0.12	0.56
1	6	5.8	0.8	2.4	0.94	0.61	1.44	2.03	0.97	0
1	7.8	7.8	0.8	2.6	1.64	1.31	1.66	3.04	0.14	0
1	6	6.4	1.2	2.6	1.2	0.78	1.47	2.25	0.3	0
1	15	8.4	4	3.6	2.07	3.77	4.64	3.34	0.58	0.61
1	18.4	8	2	2.2	1.51	8.23	2.1	6.18	0.39	0
1	18.6	7.8	4.2	3.6	2.94	6.13	2.19	4.82	2.33	0.19
1	9.2	15	2.4	7	1.27	0.79	5.94	1.2	0	0
1	10.8	7.2	1.2	3.6	1.14	1.38	1.32	6.96	0	0
1	8.6	6	0.6	2.2	1.16	0.53	1.97	4.94	0	0
1	9.4	0	2.4	0	2.12	0	3.72	3.22	0.17	0.17
1	42.2	19.4	10.4	10.2	1.75	9.5	10.78	19.75	0.21	0.21
1	21.4	16	7.4	9	2.5	0.58	5.23	9.8	0.89	2.39
1	8.8	6.2	1.8	3.2	1.4	0.86	1.95	3.61	0.2	0.78
1	15.2	7.4	3.8	2.8	1.71	0.41	6.76	5.81	0.52	0
1	14.4	7.6	3.8	2.6	2.14	0.86	4.9	6.21	0.29	0
1	16.2	7.4	3.8	3	1.83	2.67	4.19	5.29	2.23	0
1	7	5.6	0.8	2	1.38	1.57	1.11	2.59	0.35	0
1	20.2	10.4	6	3.8	2.38	0.18	7.47	9.61	0.58	0
1	33.6	0	12.8	0	3.68	2.05	10.3	11.56	4.54	1.47
1	35.6	6.8	10.6	3.8	2.75	7.1	10.49	13.77	1.31	0.17
2	5.8	6.4	1.4	2.6	2.63	0.23	1.62	1.33	0	0
2	3	6.6	0.4	1.4	1.83	0.38	0.43	0.38	0	0
2	9.8	5.6	2.2	3.2	3.87	0.56	4	1.18	0.2	0
2	4.8	3.8	1.6	1.6	2.27	0.19	1.58	0.75	0	0
2	1.6	1.2	0	0	0.8	0	0.6	0.2	0	0
2	1.8	0.8	0.6	0	0.9	0.18	0.36	0.18	0.18	0
2	2.8	1.6	0	0.6	1.68	0.14	0.7	0.28	0	0
2	2.2	2.2	0	0.8	1.43	0	0.66	0.11	0	0
2	2.8	0.2	0.2	0	1.96	0	0.7	0.14	0	0
2	2	0.2	0.2	0	1.4	0	0.5	0.1	0	0
2	5	6.2	1	1.8	1.85	0.25	1.56	1.35	0	0
2	6.6	4.6	2.2	1	2.77	0	3.4	0.43	0	0
2	3.6	4.8	0.2	1.2	2.64	0	0.96	0	0	0
2	2.8	3.6	0.6	1.4	1.89	0.22	0.5	0.19	0	0
2	5.2	4.8	1	1.6	2.38	0.42	1.73	0.55	0.12	0
2	7	3.2	1	1	2.33	0	2.65	2.03	0	0
2	2.6	3.4	0.4	0.8	1.82	0.13	0.65	0	0	0
2	7.2	9.2	1	4.2	2.72	0.58	2.48	1.42	0	0
2	0.6	1.6	0	0	0.45	0	0	0.15	0	0
2	5.4	2	0.6	0.6	1.91	0.54	1.4	1.55	0	0
2	1.2	0.4	0	0	1.2	0	0	0	0	0
2	6.6	2.4	1.8	1	2.14	1.14	2.42	0.89	0	0
2	5.4	3.8	0.8	0.6	2.04	0.69	1.77	0.89	0	0
2	5.6	6.8	1.4	3	2.17	0	2.39	1.05	0	0
2	3.2	2.2	0.2	0.4	1.71	0	1.39	0.11	0	0
2	5.8	8.2	0.6	4.2	3.29	0.58	1.35	0.58	0	0
2	3.4	4.8	0	2.2	2.36	0	0.91	0.14	0	0
2	10.6	6.8	2.6	3.2	2.41	1.71	3.69	2.79	0	0
2	9.2	9.4	1.8	3.4	4.08	0.88	2.87	1.37	0	0
